# Supplementary material for: Rapid spread of a densovirus in a major crop pest following wide-scale adoption of Bt-cotton in China
Source: eLife. 2021 Jul 15;10:e66913. doi: 10.7554/eLife.66913 (PMC8324301; doi:10.7554/eLife.66913)
Supplement: Figure 4—source data 1. [file elife-66913-fig4-data1.xlsx]

## Sheet: Sheet1
	2015		2016			HaDV2	2015		2016
	HaDV2-	HaDV2+	HaDV2-	HaDV2+			RADR	Standard error	RADR	Standard error
	0.4173	0.3209	0.534375	0.501117		HaDV2-	0.51793	0.01481	0.52977	0.01388
	0.51819	0.364615	0.523529	0.502806		HaDV2+	0.61827	0.00342	0.60782	0.00446
	0.555626	0.39974	0.546218	0.520073
	0.563442	0.382178	0.539394	0.523504
	0.570535	0.436364	0.528497	0.508929
	0.409473	0.444183	0.506579	0.567376
	0.453947	0.489796		0.546233
	0.468719	0.527584		0.55102
	0.492857	0.527778		0.552263
	0.530154	0.527806		0.558824
	0.534323	0.549505		0.5625
	0.534545	0.55		0.565957
	0.549199	0.550198		0.56705
	0.581699	0.551648		0.567742
	0.589	0.552159		0.57
		0.552359		0.570825
		0.552486		0.574694
		0.553095		0.575342
		0.572641		0.578947
		0.579291		0.579048
		0.5801		0.579196
		0.58042		0.579545
		0.581495		0.58266
		0.582437		0.583719
		0.582437		0.583864
		0.582794		0.587814
		0.582822		0.591133
		0.583333		0.592473
		0.586387		0.594524
		0.592105		0.597297
		0.594444		0.597403
		0.595041		0.601473
		0.596273		0.605172
		0.597572		0.607143
		0.597633		0.60968
		0.598684		0.613889
		0.598802		0.616883
		0.6		0.617413
		0.600198		0.617816
		0.601504		0.618343
		0.601602		0.62177
		0.606667		0.624155
		0.606805		0.63
		0.606863		0.631715
		0.607143		0.63354
		0.607407		0.633554
		0.607407		0.634615
		0.607673		0.635707
		0.608974		0.63871
		0.609035		0.639523
		0.610509		0.642857
		0.610687		0.644068
		0.611511		0.645614
		0.611653		0.645937
		0.613176		0.648649
		0.616858		0.650407
		0.616887		0.65098
		0.627767		0.651596
		0.628272		0.6528
		0.628385		0.656716
		0.629139		0.65812
		0.6294		0.658333
		0.6294		0.660661
		0.629834		0.661157
		0.632629		0.666667
		0.634085		0.666667
		0.634375		0.666667
		0.635762		0.668721
		0.635802		0.670807
		0.636364		0.673993
		0.645161		0.675641
		0.645652		0.683529
		0.648649		0.688618
		0.649007		0.690771
		0.65		0.726316
		0.650407		0.732558
		0.65048		0.733276
		0.651282		0.734394
		0.651316		0.736842
		0.654135		0.737304
		0.656267		0.740385
		0.656891		0.743921
		0.658702		0.744681
		0.659592		0.769481
		0.659748		0.824919
		0.659748		0.502554
		0.660046		0.539394
		0.660473		0.514107
		0.660473		0.55814
		0.660644		0.54023
		0.663594		0.540698
		0.664032		0.547059
		0.667501		0.535916
		0.667904		0.541071
		0.668576		0.54321
		0.668919		0.544379
		0.669014		0.545977
		0.669187		0.546814
		0.669887		0.54878
		0.675192		0.550562
		0.675532		0.550802
		0.676301		0.550802
		0.676617		0.551136
		0.695147		0.553863
		0.695305		0.554913
		0.69555		0.55814
		0.695652		0.558824
		0.695906		0.558824
		0.696833		0.559509
		0.697207		0.559748
		0.697297		0.560535
		0.697479		0.560535
		0.697494		0.560976
		0.697712		0.561728
		0.69916		0.564767
		0.700136		0.565476
		0.700376		0.565476
		0.70098		0.567273
		0.701095		0.567901
		0.703741		0.568182
		0.70506		0.569061
		0.707143		0.569536
		0.707143		0.569832
		0.707692		0.569832
		0.715719		0.570588
		0.716007		0.572193
		0.716667		0.574468
		0.716975		0.574586
		0.717277		0.574713
		0.717557		0.575949
		0.717807		0.57754
		0.717996		0.577573
		0.718121		0.579212
		0.71831		0.579268
		0.718563		0.579618
		0.71875		0.581818
		0.72		0.582822
		0.720339		0.583333
		0.722851		0.584575
		0.723639		0.584795
		0.723684		0.585635
		0.724638		0.585923
		0.725		0.588235
		0.725275		0.59116
		0.725898		0.591195
		0.726531		0.592593
		0.726718		0.595592
		0.726744		0.597403
		0.726776		0.597561
		0.726804		0.597701
		0.733696		0.597701
		0.733801		0.6
		0.734266		0.603448
		0.736111		0.603448
		0.736234		0.605208
		0.738176		0.609272
		0.740506		0.610984
		0.740727		0.618182
		0.740964		0.618487
		0.742331		0.626667
		0.743781		0.629032
		0.745455		0.629834
		0.745946		0.642424
		0.746269		0.644295
		0.747139		0.644501
		0.748118		0.65
		0.748201		0.654088
		0.748387		0.658065
		0.749164		0.662252
		0.751412		0.681481
		0.751678		0.705202
		0.760421		0.747059
		0.760531		0.752809
		0.760725		0.764912
		0.761278
		0.761905
		0.76247
		0.763117
		0.763636
		0.766507
		0.766667
		0.767742
		0.767778
		0.768898
		0.769014
		0.769257
		0.771264
		0.77145
		0.772314
		0.772996
		0.77335
		0.774869
		0.777333
		0.777356
		0.795334
		0.802807
		0.804997
		0.43787
		0.445807
		0.452381
		0.454482
		0.458647
		0.459293
		0.464416
		0.470455
		0.473684
		0.44329
		0.473684
		0.475
		0.478642
		0.478829
		0.479452
		0.481481
		0.48366
		0.483937
		0.484848
		0.485651
		0.485821
		0.486651
		0.487342
		0.489828
		0.492715
		0.495957
		0.49635
		0.497225
		0.5
		0.5
		0.5
		0.500423
		0.50202
		0.502024
		0.502125
		0.503356
		0.506667
		0.506944
		0.507042
		0.507143
		0.507353
		0.507692
		0.508235
		0.508929
		0.509004
		0.509161
		0.51018
		0.510288
		0.51049
		0.511091
		0.511111
		0.511111
		0.511373
		0.511416
		0.512821
		0.513071
		0.514085
		0.514778
		0.51479
		0.514914
		0.515385
		0.515625
		0.516049
		0.517007
		0.517258
		0.517631
		0.518797
		0.519737
		0.519829
		0.520103
		0.520833
		0.521053
		0.521127
		0.521739
		0.521739
		0.523139
		0.52349
		0.524203
		0.524328
		0.524462
		0.524713
		0.524713
		0.524823
		0.525
		0.525547
		0.525547
		0.525722
		0.526123
		0.526174
		0.527101
		0.527473
		0.527524
		0.528986
		0.528986
		0.528993
		0.529655
		0.529711
		0.530345
		0.530876
		0.531009
		0.531034
		0.531646
		0.533542
		0.533958
		0.534173
		0.53528
		0.535625
		0.535897
		0.537155
		0.537415
		0.537815
		0.538084
		0.538235
		0.538462
		0.538565
		0.538776
		0.538961
		0.539773
		0.539877
		0.540507
		0.541176
		0.541264
		0.541304
		0.541353
		0.541794
		0.54198
		0.542024
		0.542024
		0.542529
		0.54265
		0.542857
		0.54321
		0.54529
		0.545302
		0.545455
		0.545455
		0.546118
		0.54662
		0.5467
		0.547158
		0.547445
		0.548263
		0.548397
		0.54902
		0.549379
		0.549398
		0.549677
		0.55
		0.55
		0.550538
		0.550905
		0.551042
		0.569444
		0.570136
		0.57037
		0.570428
		0.570827
		0.571088
		0.571429
		0.571812
		0.572104
		0.572566
		0.572852
		0.573064
		0.573248
		0.573571
		0.573737
		0.574163
		0.574163
		0.574233
		0.575448
		0.575481
		0.575712
		0.575758
		0.576249
		0.576923
		0.576993
		0.577236
		0.577334
		0.577626
		0.578231
		0.578231
		0.578431
		0.578916
		0.578947
		0.57907
		0.579243
		0.57931
		0.57971
		0.580012
		0.580012
		0.580556
		0.581081
		0.581395
		0.582011
		0.58231
		0.582488
		0.583538
		0.583671
		0.585714
		0.585859
		0.586667
		0.587102
		0.587229
		0.588068
		0.588406
		0.588535
		0.589286
		0.589474
		0.589908
		0.59026
		0.590541
		0.590753
		0.590769
		0.591195
		0.591429
		0.591667
		0.591837
		0.592164
		0.592699
		0.592742
		0.592857
		0.594167
		0.595041
		0.595588
		0.596059
		0.596154
		0.596154
		0.59696
		0.597143
		0.597811
		0.597919
		0.598358
		0.59867
		0.599303
		0.6
		0.602588
		0.602597
		0.602837
		0.603306
		0.604963
		0.605291
		0.605442
		0.605655
		0.606396
		0.607143
		0.607615
		0.608392
		0.608428
		0.608466
		0.608629
		0.608696
		0.608696
		0.608824
		0.609209
		0.609814
		0.610048
		0.610939
		0.611111
		0.611244
		0.611506
		0.611702
		0.61181
		0.612081
		0.612097
		0.613139
		0.613218
		0.613228
		0.614246
		0.614597
		0.615297
		0.615385
		0.621583
		0.621788
		0.622426
		0.623377
		0.624369
		0.624451
		0.625
		0.625556
		0.62585
		0.625954
		0.626984
		0.627451
		0.627646
		0.627656
		0.627845
		0.628571
		0.628571
		0.629064
		0.629895
		0.630409
		0.630729
		0.631098
		0.631347
		0.632353
		0.633202
		0.633333
		0.63354
		0.634156
		0.634242
		0.634429
		0.634581
		0.635161
		0.635238
		0.635309
		0.635354
		0.635815
		0.63598
		0.635985
		0.636145
		0.636364
		0.636414
		0.637016
		0.639456
		0.639535
		0.639632
		0.63985
		0.64
		0.640399
		0.641009
		0.642191
		0.642336
		0.643657
		0.643848
		0.644022
		0.646667
		0.647059
		0.647373
		0.647901
		0.648684
		0.649558
		0.649573
		0.649713
		0.650118
		0.650407
		0.650678
		0.650704
		0.653061
		0.653199
		0.654349
		0.654636
		0.655844
		0.656115
		0.656716
		0.656958
		0.657143
		0.657486
		0.658301
		0.659847
		0.66
		0.661491
		0.665266
		0.665476
		0.666056
		0.666667
		0.666667
		0.666667
		0.666667
		0.667883
		0.668243
		0.668675
		0.66887
		0.669355
		0.670588
		0.671108
		0.671642
		0.68323
		0.68408
		0.684564
		0.686283
		0.686422
		0.68996
		0.691187
		0.692564
		0.693506
		0.694737
		0.695172
		0.695858
		0.697285
		0.7
		0.700686
		0.70234
		0.702751
		0.702778
		0.704575
		0.70464
		0.705882
		0.707692
		0.708873
		0.711997
		0.712575
		0.71535
		0.716685
		0.716864
		0.720607
		0.723112
		0.726997
		0.72778
		0.727981
		0.72807
		0.731707
		0.731755
		0.732353
		0.736133
		0.739583
		0.741935
		0.746032
		0.753003
		0.755172
		0.756637
		0.761165
		0.763393
		0.763393
		0.770568
		0.77094
		0.778539
		0.784091
		0.787879
		0.795276
		0.797269
		0.797561
		0.797727
		0.805195
		0.891041
